# Supplementary material
Source: PubMed Central journal article supplement (PMC6697103)

Ext Data Fig. 11j

**TSHP2 + Vinculin**

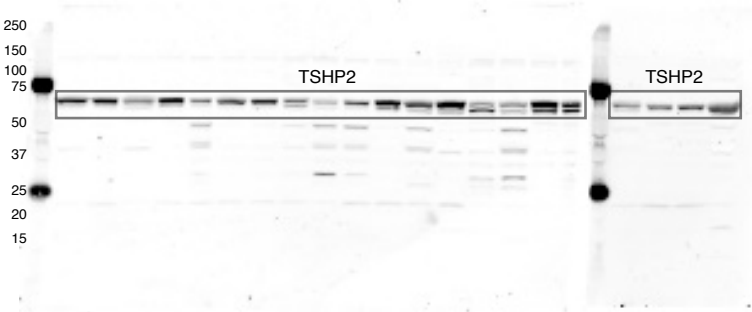

**TSHP2 + Vinculin**

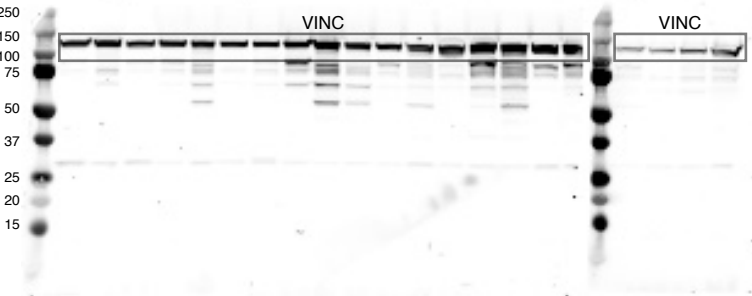

**PSHP2 + Vinculin**

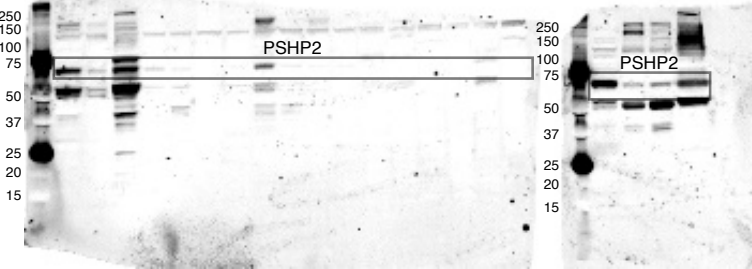

**PSHP2 + Vinculin**

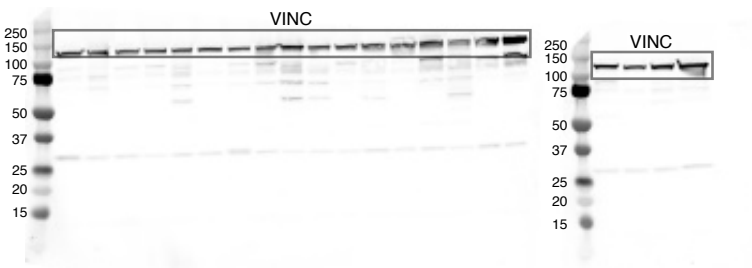

Supplement: NIHMS1032762-supplement-Suppl_Fig_1.pdf [file NIHMS1032762-supplement-Suppl_Fig_1.pdf]
